# Supplementary material for: Effects of paclitaxel (PTX) prodrug-based self-assembly peptide hydrogels combined with suberoylanilide hydroxamic acid (SAHA) for PTX-resistant cancer and synergistic antitumor therapy
Source: Royal Society of Chemistry journal article supplement (doi:10.1039/c6ra19917h), 2016-01-01
Supplement: c6ra19917h1.pdf [file c6ra19917h1.pdf]

## Supporting Information

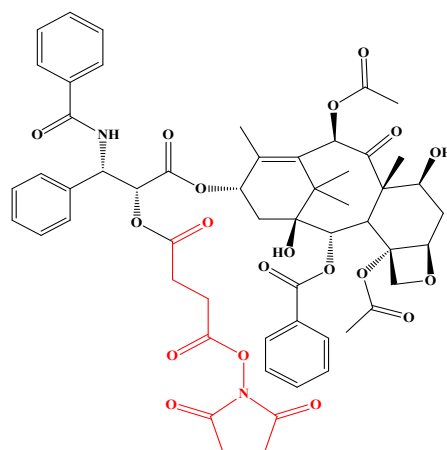

Fig.S1 The structure of PTX-succi-NHS

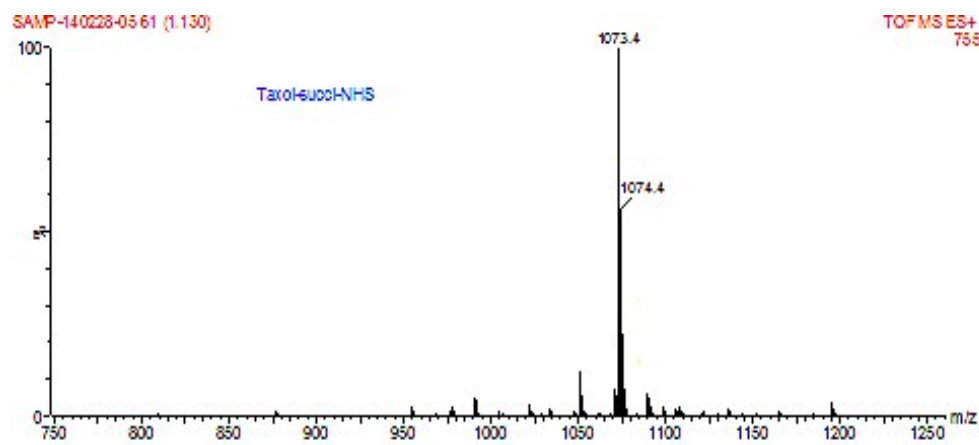

Fig.S2 The MS spectrum of PTX-succi-NHS

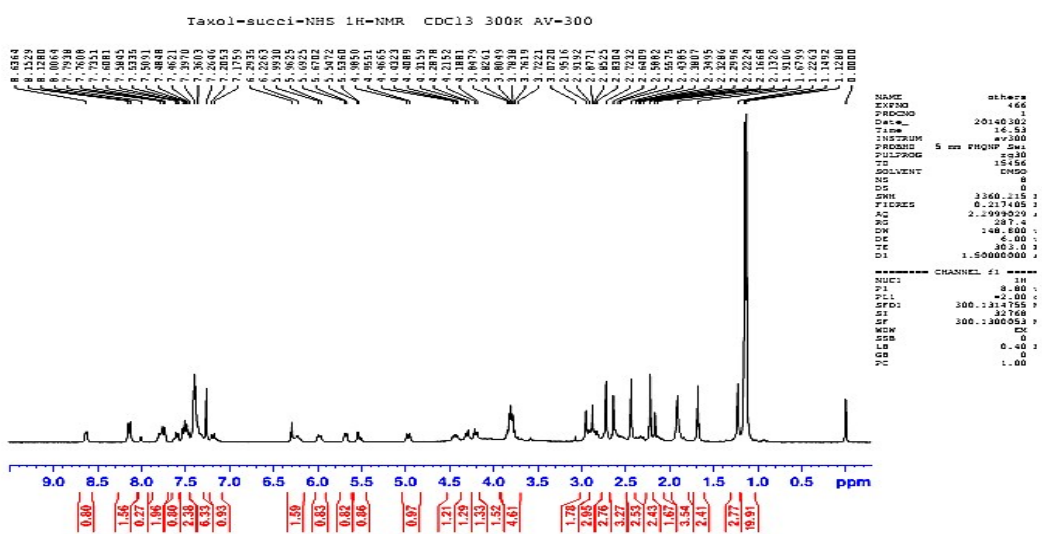

Fig.S3 The  $^1\text{H}$  NMR spectrum of PTX-succi-NHS

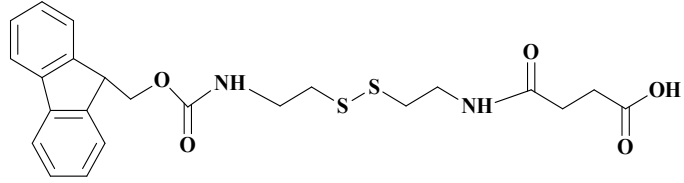

**Fig.S4** The structure of Fmoc-CS

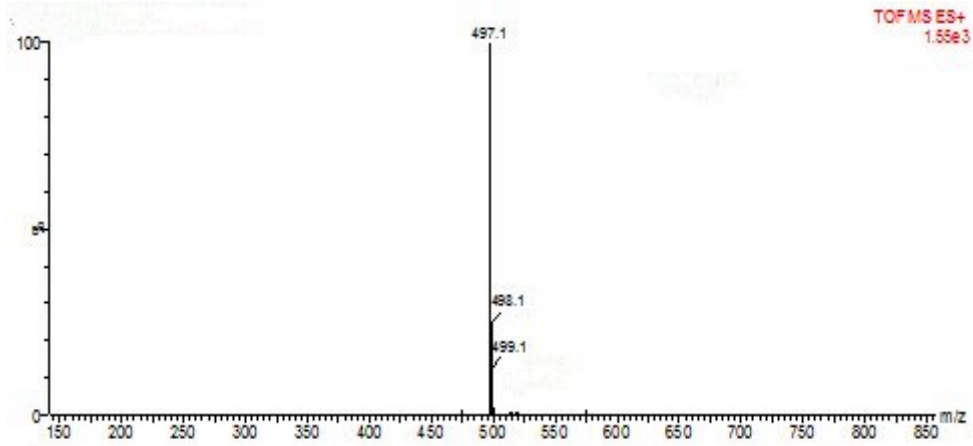

**Fig.S5** The MS spectrum of Fmoc-CS

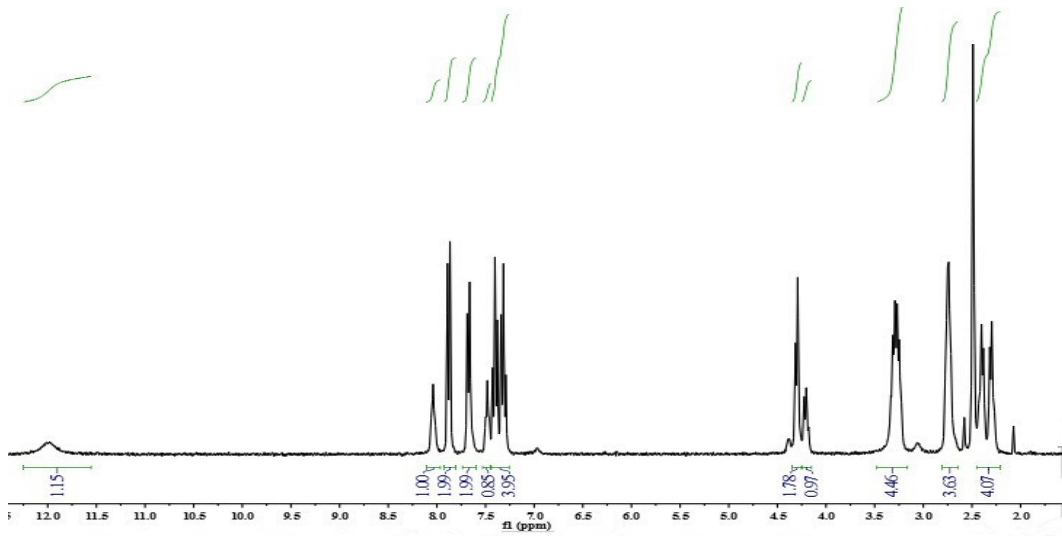

**Fig.S6** The  $^1\text{H}$  NMR spectrum of Fmoc-CS

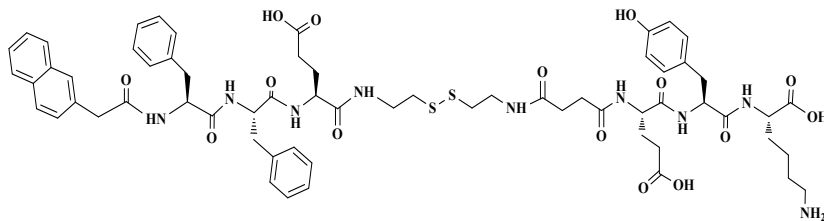

**Fig.S7** The structure of Nap-peptide

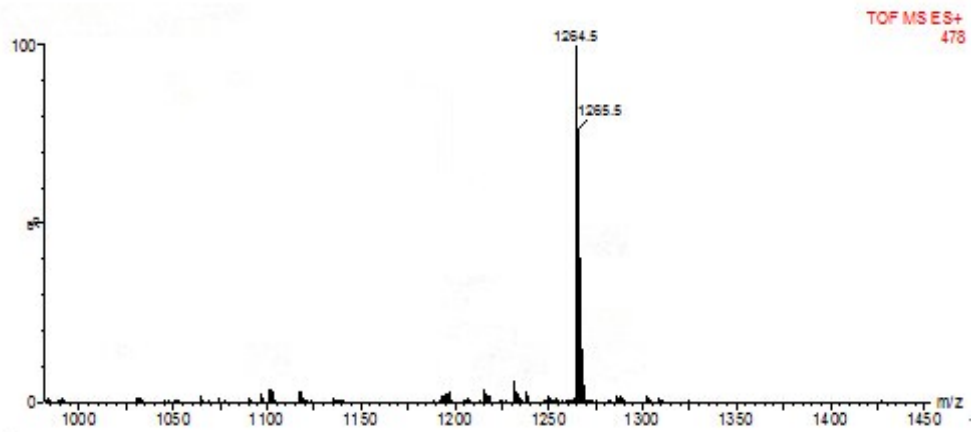

Fig.S8 The MS spectrum of Nap-peptide

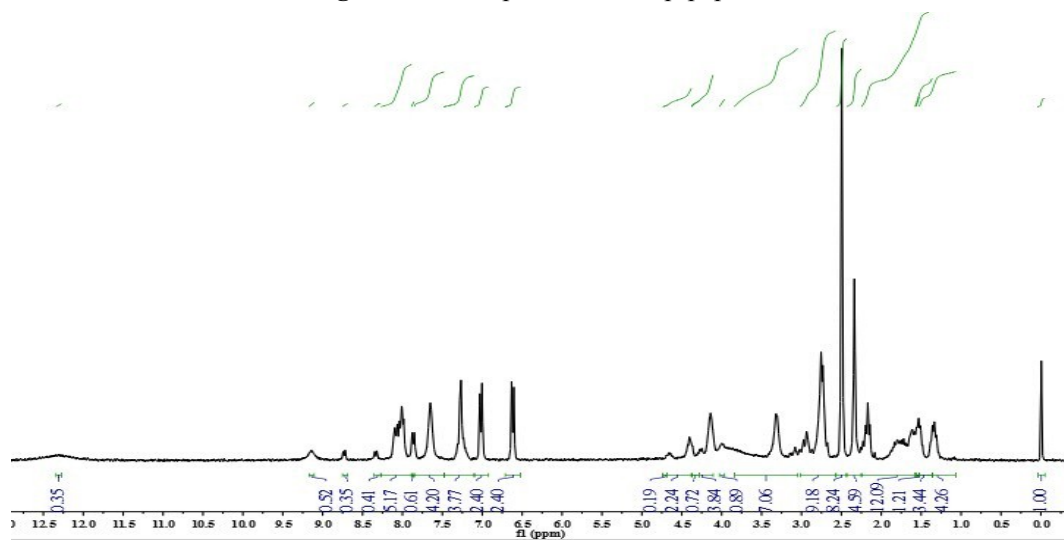

Fig.S9 the NMR spectrum of Nap-peptide

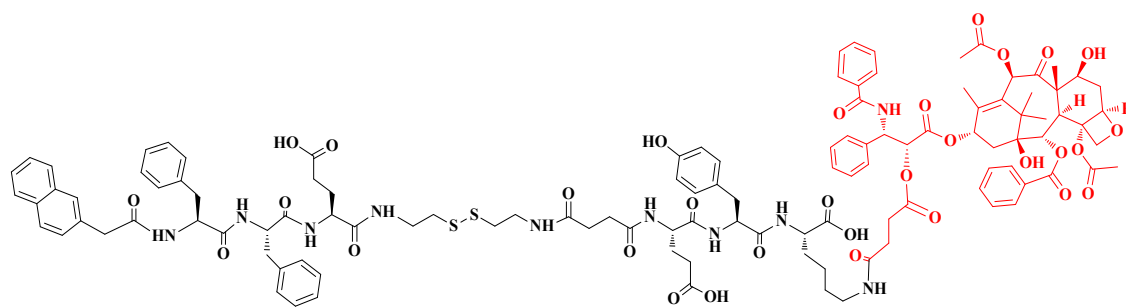

Fig.S10 the structure of Nap-PTX

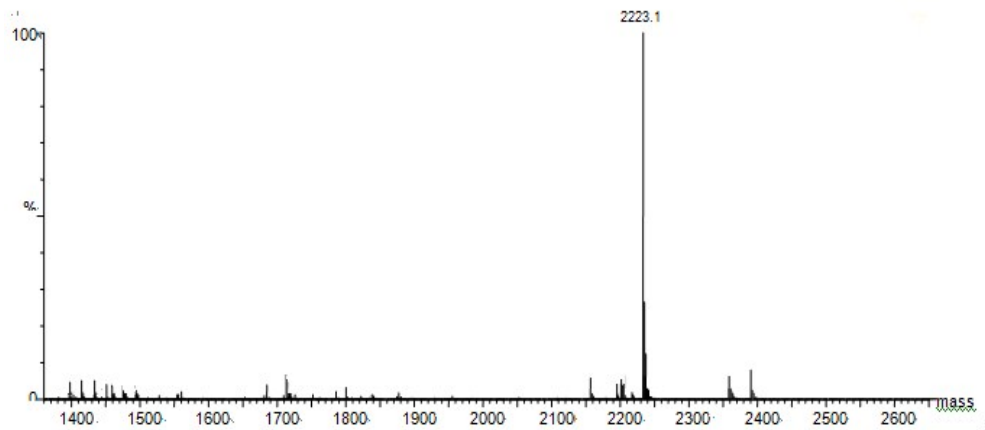

Fig.S11 the MS spectrum of Nap-PTX

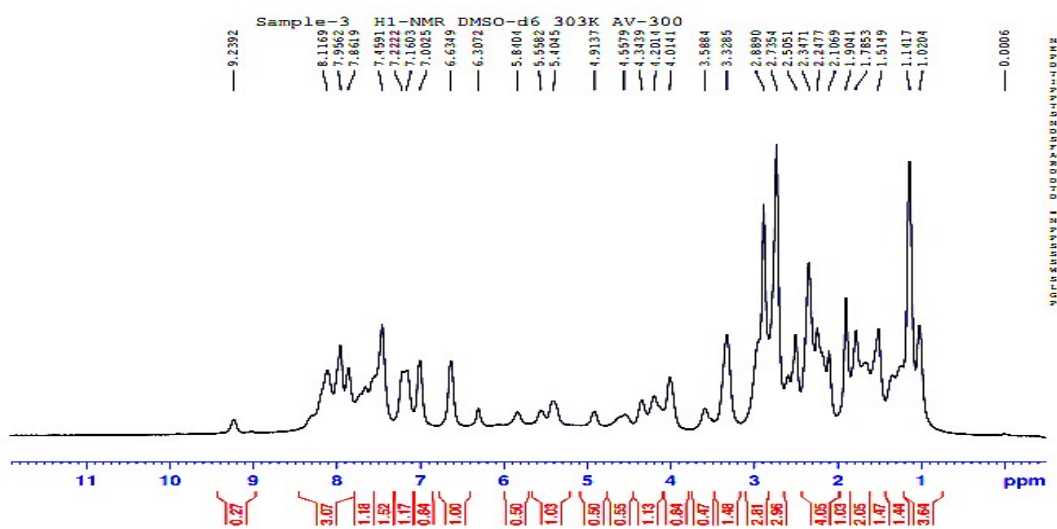

Fig.S12 The <sup>1</sup>H NMR spectrum of Nap-PTX
